# Supplementary material for: Rapid Evolution of Enormous, Multichromosomal Genomes in Flowering Plant Mitochondria with Exceptionally High Mutation Rates
Source: PubMed Central journal article supplement (PMC3260318; doi:10.1371/journal.pbio.1001241), 2012-01-17

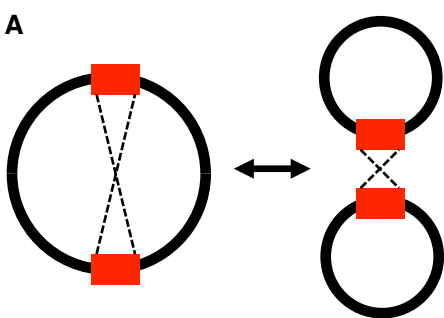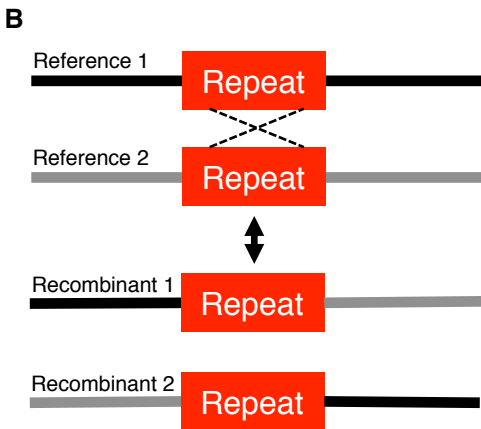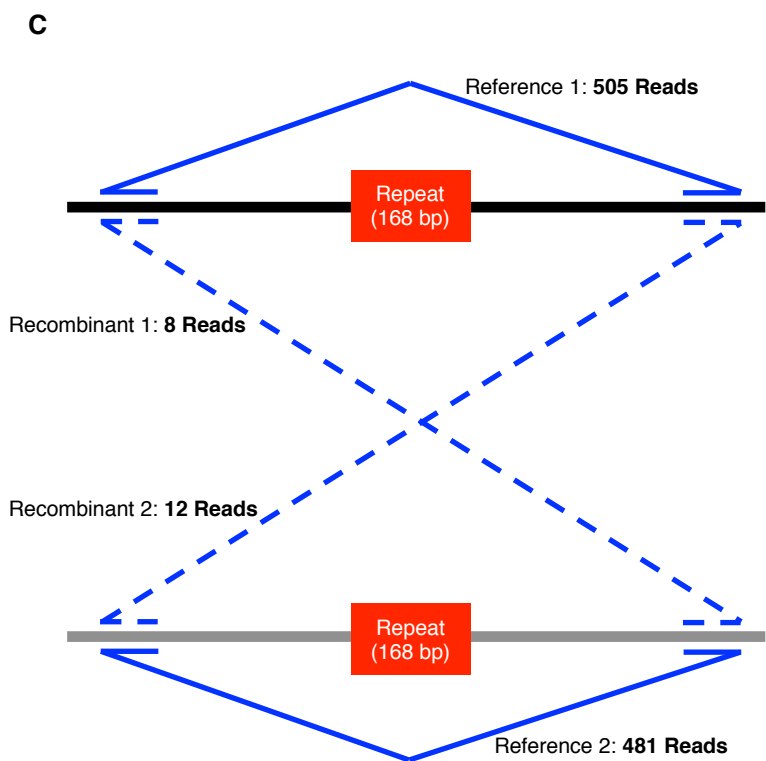

Supplement: pbio.1001241.s004.pdf [file pbio.1001241.s004.pdf]
